# Supplementary material for: A new potential strategy for cutaneous squamous cell carcinoma treatment by generating serum-based antibodies from tumor-exposed mice
Source: eLife. 2024 Oct 15;13:RP95678. doi: 10.7554/eLife.95678 (PMC11479585; doi:10.7554/eLife.95678)
Supplement: Figure 2—source data 1. [file elife-95678-fig2-data1.xlsx]

## Sheet: Tumor growth
						Tumor volumes	Tumor volumes	Tumor volumes	Tumor volumes	Tumor volumes	Tumor volumes	Tumor volumes	Tumor volumes	Tumor volumes	Tumor volumes	Tumor volumes	Tumor volumes			Tumor volumes	Tumor volumes	Tumor volumes
		Weight 0 week	Weight 12 week	Weigtht 15 week		DMBA	DMBA	TPA	TPA	TPA	TPA	TPA	TPA	TPA	TPA	TPA	TPA			serum injection	serum injection	serum injection
		（g）	(g)	(g)		mm³	mm³	mm³	mm³	mm³	mm³	mm³	mm³	mm³	mm³	mm³	mm³			mm³	mm³	mm³
mouse	Groups					1 week	2 week	3 week	4 week	5 week	6 week	7 week	8 week	9 week	10 week	11 week	12 week	13 week	14 week	15 week (1 week after injection)	16 week (2 week after injection)	17 week (3 week after injection)
1	Tumor+serum treatment	20.4	24.3	28.5	1	0	0	1	2	3.1	3.8	4.3	6.7	8.7	9.9	12.4	13.2			13.1	10.3	8.3
2	Tumor+serum treatment	20.6	24.5	25.3	2	0	0	1.1	2	2.9	3.4	4.9	7.2	8.4	9.3	11.9	12.4			12.2	11.4	8.1
3	Tumor+serum treatment	20.1	26.1	26.1	3	0	0	0.7	1	1.9	2.7	5.1	7.7	8.9	9.9	10.7	13.7			13.2	10.3	9.5
4	Tumor+serum treatment	21.2	25.1		4	0	0.2	0.4	1.5	2.3	2.9	4.2	7.2	9.2	10.2	11.4	12.5			12.4	10.8
5	Tumor+serum treatment	20.5	22.2		5	0	0	1	1.1	2.6	3.6	4.8	6.9	8.8	9.4	12.4	13.2			12.2	10.1
6	Tumor+serum treatment	20.7	24.3		6	0.1	0	1	1.1	3.1	3.7	5.3	8.1	8.7	9.6	12.4	13.5			10.3	dead
7	Tumor+serum treatment	20.7	24.8		7	0	0	0.5	0.9	1.7	2.7	4.2	7.9	9.2	10.1	12.5	12.6			12.2	10.9
8	Tumor+serum treatment	20.3	25.2		8	0	0.1	0.6	2.1	2.5	3.6	4.4	7.5	9.1	9.3	11.4	13.6			12.4
9	Tumor+serum treatment	20.3	23.9		9	0	0	0.2	2.5	2.9	3.9	4.9	6.7	8.4	9.8	11.7	13.8			12.2
10	Tumor+serum treatment	20.8	27.1		10	0	0	0.4	1.4	1.5	2.8	4.2	7.5	8.6	10.4	11.9	14.1			13.8
1	Tumor+no serum treatment	20.3	24.7	26.3	1	0	0	0.2	1.4	1.8	2.6	5.2	7.9	8.8	10.5	11.7	13.6			14.2	13.2	14.1
2	Tumor+no serum treatment	20.1	25.2	29.2	2	0	0	1	1.9	2.4	2.8	4.7	7.4	8.6	9.9	11.3	13.8			13.2	13.9	13.8
3	Tumor+no serum treatment	20.2	24.9	27.3	3	0	0.1	1	2	2.3	3.4	4.6	6.7	8.5	10.1	12.7	14.2			13.9	13.4	12.5
4	Tumor+no serum treatment	20.4	24.3		4	0	0.2	0.8	2.1	2.4	3.6	5.4	8.2	9.4	10.2	12.9	12.9			13.1	12.8	13.6
5	Tumor+no serum treatment	20.5	27.7		5	0	0	0.5	1.6	2.8	3.3	5.8	7.1	8.6	9.9	12.5	13.5			13.1	12.5
6	Tumor+no serum treatment	20.8	24.4		6	0	0.2	0.6	1.9	2.6	3.8	4.6	7	8.1	9.5	12.4	15.7			14.9	13.3
7	Tumor+no serum treatment	20.5	24.4		7	0	0	0.7	1.2	2.7	3.9	5.6	7.5	8.3	9.4	11.2	13.2			13.6	13.2
8	Tumor+no serum treatment	20.3	25.3		8	0	0	0.8	2.2	3	3.8	5.4	7.8	8.4	9.7	11.4	12.5			12.2
9	Tumor+no serum treatment	20.7	25.2		9	0	0	1	1.8	2.8	3.7	5.5	7.4	8.6	9.9	11.4	12.8			12.6
10	Tumor+no serum treatment	21.1	24.3		10	0	0	0.1	1.9	2.7	3.3	5.9	7.2	8.3	9.9	12.6	13.7			12.9
						0.01	0.03	0.69	1.56	2.45	3.31	4.63	7.34	8.8	9.79	11.87	13.26			12.4	10.6333	8.63333
1	Control+serum treatment (control 1)	20.3	26.3	29.3		0	0.05	0.67	1.8	2.55	3.42	5.27	7.42	8.56	9.9	12.01	13.59			13.37	13.1857	13.5
2	Control+serum treatment (control 1)	20.3	27.2	27.3
3	Control+serum treatment (control 1)	20.5	26.3	28.8		0.03	0.0640312	0.301496	0.525738	0.553624	0.457056	0.395095	0.460869	0.282843	0.364555	0.555068	0.558928			0.875214	0.44597	0.618241
4	Control+serum treatment (control 1)	20	26.8			0	0.0806226	0.306757	0.296648	0.323265	0.414246	0.458367	0.428486	0.338231	0.306594	0.633167	0.856096			0.756373	0.412063	0.604152
5	Control+serum treatment (control 1)	20.7	26.8
6	Control+serum treatment (control 1)	20.4	26.9
7	Control+serum treatment (control 1)	20.4	26.4
8	Control+serum treatment (control 1)	20.5	27.1
9	Control+serum treatment (control 1)	20.2	27.2
10	Control+serum treatment (control 1)	20.1	26.5
1	Control+no serum treatment (control 2)	20.4	26.8	29.2
2	Control+no serum treatment (control 2)	20.3	27.3	27.4
3	Control+no serum treatment (control 2)	21.3	25.2	28.9
4	Control+no serum treatment (control 2)	20.4	26.1
5	Control+no serum treatment (control 2)	20.1	26.8
6	Control+no serum treatment (control 2)	20.7	26.9
7	Control+no serum treatment (control 2)	20.6	28.8
8	Control+no serum treatment (control 2)	20.6	27.3
9	Control+no serum treatment (control 2)	20.3	25.2
10	Control+no serum treatment (control 2)	20.3	25.1
		All	DMBA/TPA treatment	DMBA/TPA treatment
		20.4725	24.895	26.6333
		0.289817	1.11869	1.35974
			Control	Serum injection
			26.65	27.6
			0.828553	1.20277
				Control 1
				28.4667
				0.849837
				Control 2
				28.5
				0.787401
	Serum provider
1
2
3
4
5
6
7
8
9
10
