# Supplementary material for: A new potential strategy for cutaneous squamous cell carcinoma treatment by generating serum-based antibodies from tumor-exposed mice
Source: eLife. 2024 Oct 15;13:RP95678. doi: 10.7554/eLife.95678 (PMC11479585; doi:10.7554/eLife.95678)
Supplement: Figure 3—source data 1. [file elife-95678-fig3-data1.xlsx]

## Sheet: ELISA
		p53 Week 12	p53 week15	p53 week 16	p53 week 17		Bax week 12	Bax week 15	Bax week 16	Bax week 17		Bcl-xL week 12	Bcl-xL week 15	Bcl-xL week 16	Bcl-xL week 17		NF-κB week 12	NF-κB week 15	NF-κB week 16	NF-κB week 17
Mouse	Groups	pg/ml	pg/ml	pg/ml	pg/ml		pg/ml	pg/ml	pg/ml	pg/ml		ng/ml	ng/ml	ng/ml	ng/ml		OD 450 nm	OD 450 nm	OD 450 nm	OD 450 nm
1	Tumor+serum treatment	6016	5612	4628	4087		1598	1894	2096	2679		5.11	4.8	4.32	3.78		4.87	4.45	3.55	3.21
2	Tumor+serum treatment	6415	5085	4812	4294		1783	1930	2356	2875		4.98	4.65	4.04	3.26		4.03	4.01	3.62	3.08
3	Tumor+serum treatment	6772	5292	5084	3992		1684	1725	2207	2667		5.44	4.71	4.16	3.06		4.95	4.65	3.44	3.18
1	Tumor+no serum treatment	6056	7002	6809	6667		1502	1587	1698	1505		4.76	5.02	4.88	4.76		4.21	4.61	4.28	4.76
2	Tumor+no serum treatment	5657	5985	6547	5866		1892	1603	1568	1624		4.82	4.57	4.87	4.69		3.99	4.06	4.67	4.12
3	Tumor+no serum treatment	6064	5856	5560	5927		1785	1687	1699	1672		4.96	4.76	5.12	5.02		4.36	4.27	4.05	4.33
1	Control+serum treatment (control 1)	2671	3029	3135	3428		2678	2786	2587	3001		2.16	2.37	2.37	2.43		1.17	1.89	1.44	1.11
2	Control+serum treatment (control 1)	3176	3178	2871	2817		2784	2796	2894	2866		2.76	2.41	2.42	2.41		2.03	1.56	1.73	1.65
3	Control+serum treatment (control 1)	2829	2791	3034	3127		3026	3017	2678	2785		2.57	2.28	2.68	2.49		1.98	1.82	1.89	1.89
1	Control+no serum treatment (control 2)	2734	3062	2387	2072		2777	2986	2789	2784		2.09	2.81	2.76	2.68		1.98	1.7	1.86	1.54
2	Control+no serum treatment (control 2)	3156	3225	3027	2676		2686	2365	3013	2840		2.66	2.33	2.73	2.29		1.89	1.63	1.52	1.48
3	Control+no serum treatment (control 2)	2577	2117	2676	2514		2913	2896	2876	2785		2.58	2.45	2.43	2.63		1.39	1.42	1.62	1.73
		6401	5329.67	4841.33	4124.33		1688.33	1849.67	2219.67	2740.33		5.17667	4.72	4.17333	3.36667		4.61667	4.37	3.53667	3.15667
		5925.67	6305.33	6281	6153.33		1726.33	1625.67	1655	1600.33		4.84667	4.78333	4.95667	4.82333		4.18667	4.31333	4.33333	4.40333
		2892	2999.33	3013.33	3124		2829.33	2866.33	2719.67	2884		2.49667	2.35333	2.49	2.44333		1.72667	1.75667	1.68667	1.55
		2822.33	2801.33	2696.67	2420.67		2792	2749	2892.67	2803		2.44333	2.53	2.64	2.53333		1.75333	1.58333	1.66667	1.58333
		308.794	216.789	187.313	126.086		75.5881	89.3694	106.522	95.3496		0.19362	0.0616441	0.114698	0.303462		0.41612	0.267333	0.074087	0.0555778
		190.004	537.775	512.537	364.07		164.532	43.8584	61.5196	70.2013		0.0837987	0.184451	0.115566	0.14197		0.15195	0.226618	0.255908	0.266375
		210.923	159.379	108.764	249.449		145.642	106.616	128.749	89.0955		0.250377	0.054365	0.135892	0.0339935		0.394152	0.14197	0.18625	0.32619
		244.489	488.451	261.687	255.261		93.2774	274.004	92.2039	26.1661		0.25197	0.203961	0.148997	0.173269		0.259529	0.118977	0.142673	0.106562
